# Supplementary material for: The Impact of Digital Inequities on Esophageal Cancer Disparities in the US
Source: MDPI journal article supplement (doi:10.3390/cancers15235522), 2023-11-22
Supplement: s1 [file s1]

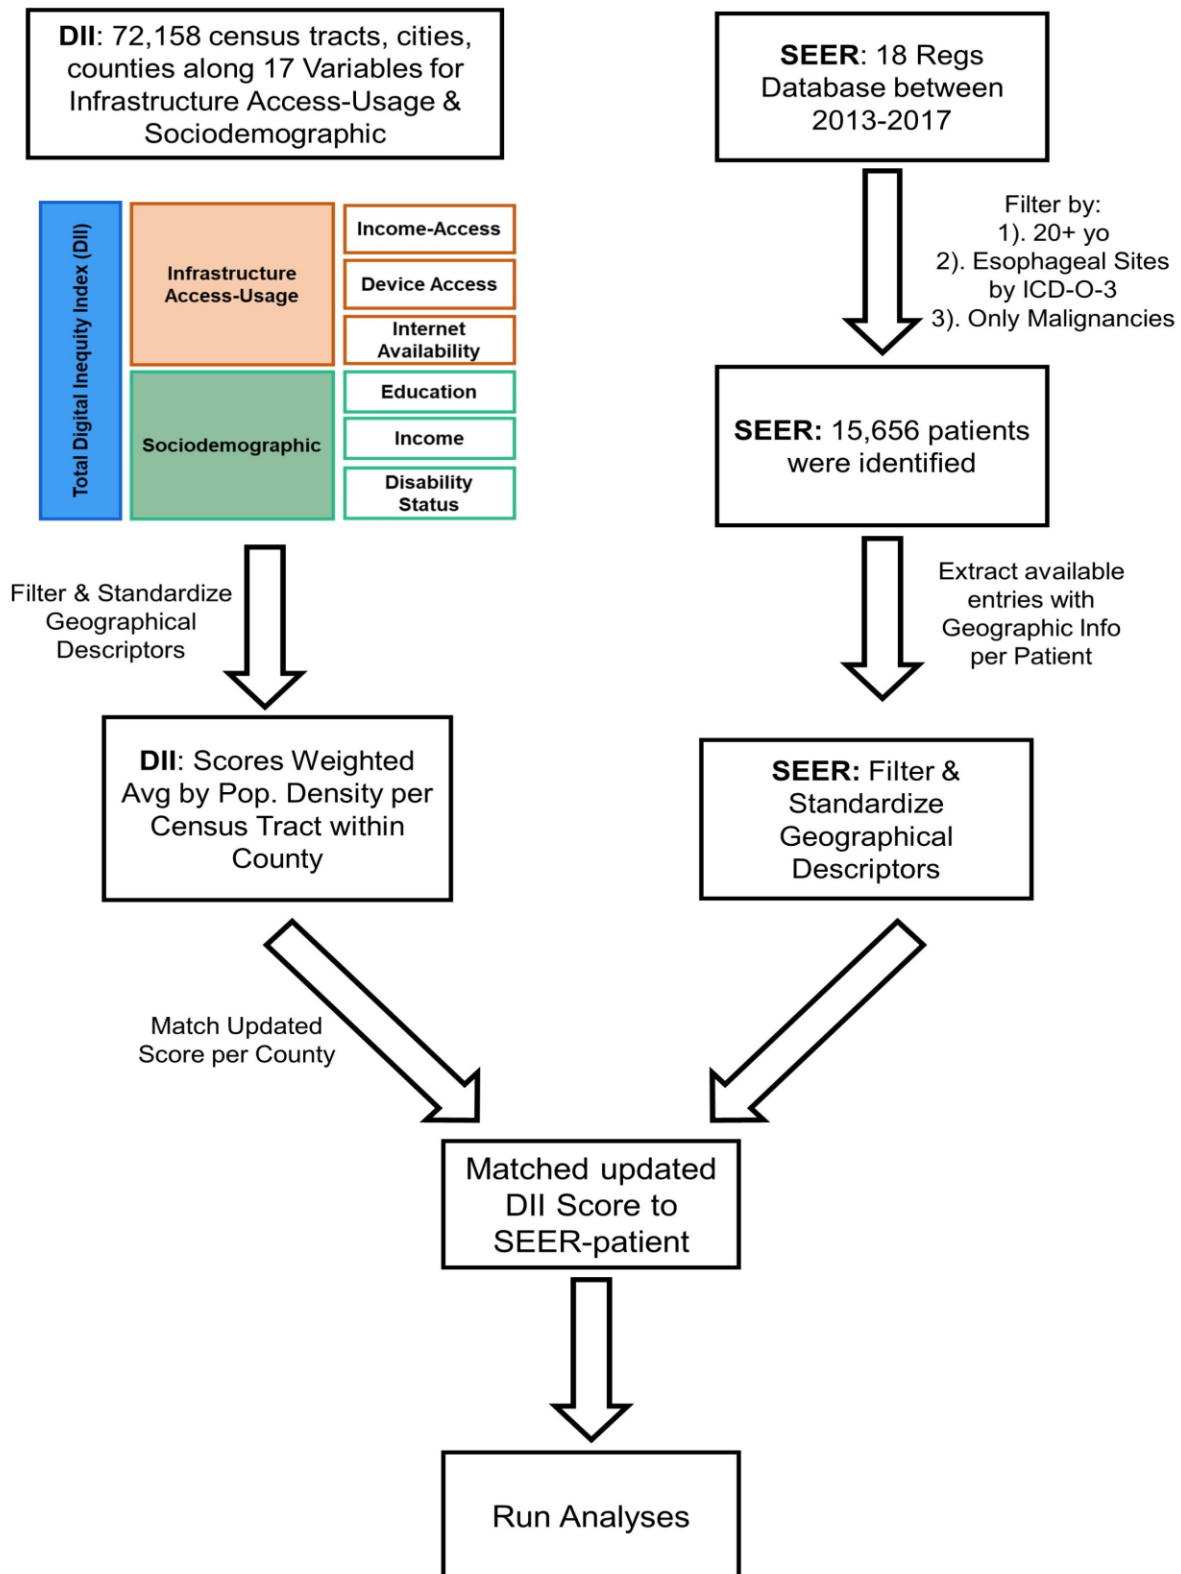

**Supplemental Figure S1. Schematic Workflow of DII & SEER Database Manipulation.**  
The Digital Inequity Index was merged with patient data from the SEER database through linked geocodes of County.

**Supplement Table S1. Variables used for DII-development**

| <b>Infrastructure-Access</b>                                              | <b>Sociodemographic</b>                                                          |
|---------------------------------------------------------------------------|----------------------------------------------------------------------------------|
| Households without a desktop or laptop                                    | 25+ years-aged people without a high-school diploma                              |
| Without access to non-mobile broadband                                    | 25+ years-aged people without an associate's degree or higher                    |
| Without access to Broadband - DSL                                         | 25+ years-aged people without a bachelor's degree or higher                      |
| Without access to Broadband - Cable                                       | Below poverty level within the last 12 months                                    |
| Without access to Broadband - Fiber                                       | Below 150% of the poverty level within the last 12 months                        |
| Without access to Broadband - Terrestrial Fixed WiFi                      | Disability status pertaining to cognitive, ambulatory, or self-care difficulties |
| Without mobile or non-mobile internet subscription of any type            |                                                                                  |
| Without an internet subscription of cable, fiber, or DSL                  |                                                                                  |
| Without a broadband subscription in households \$20,000 or less           |                                                                                  |
| Without a broadband subscription in households making \$20,000 - \$74,999 |                                                                                  |
| Without a broadband subscription in households making \$75,000 or more    |                                                                                  |
